# Supplementary material for: Crab Spider Lures Prey In Flowerless Neighborhoods
Source: PubMed Central journal article supplement (PMC5569008; doi:10.1038/s41598-017-09456-y), 2017-08-23
Supplement: 41598_2017_9456_MOESM1_ESM.pdf [file 41598_2017_9456_MOESM1_ESM.pdf]

## Supplementary Information

### Crab spider lures prey in flowerless neighborhoods

Camila Vieira, Eduardo N. Ramires, João Vasconcellos-Neto, Ronei J. Poppi & Gustavo Q. Romero\*

\*Corresponding author. E-mail: [gqromero@unicamp.br](mailto:gqromero@unicamp.br)

**This file includes:**

Figs. S1 and S2

Table S1 and S2

**Other Supplementary Information for this manuscript include:**

Movie S1. Active and live spiders without sunscreen preying hoverflies

Movie S2. Active and live spiders without sunscreen trying to prey hoverflies

Movie S3. Active and live spiders without sunscreen trying to prey butterfly

Movie S4. Anesthetized spiders with sunscreen on the ventral region

## Supplementary Figures

### Supplementary Figure S1. Statistics of reflectance for *Epicadus heterogaster*. (A)

Mean percentage of reflectance curves  $\pm$ SD of *Epicadus heterogaster* adult abdomens.

(B) Abdomens of young *Epicadus heterogaster*. Spectral reflectance was measured

from 300 to 700 nm. The left side of the dashed line indicates the UV wavelength.

Credit to the spiders drawing: Raduan A. Soleman.

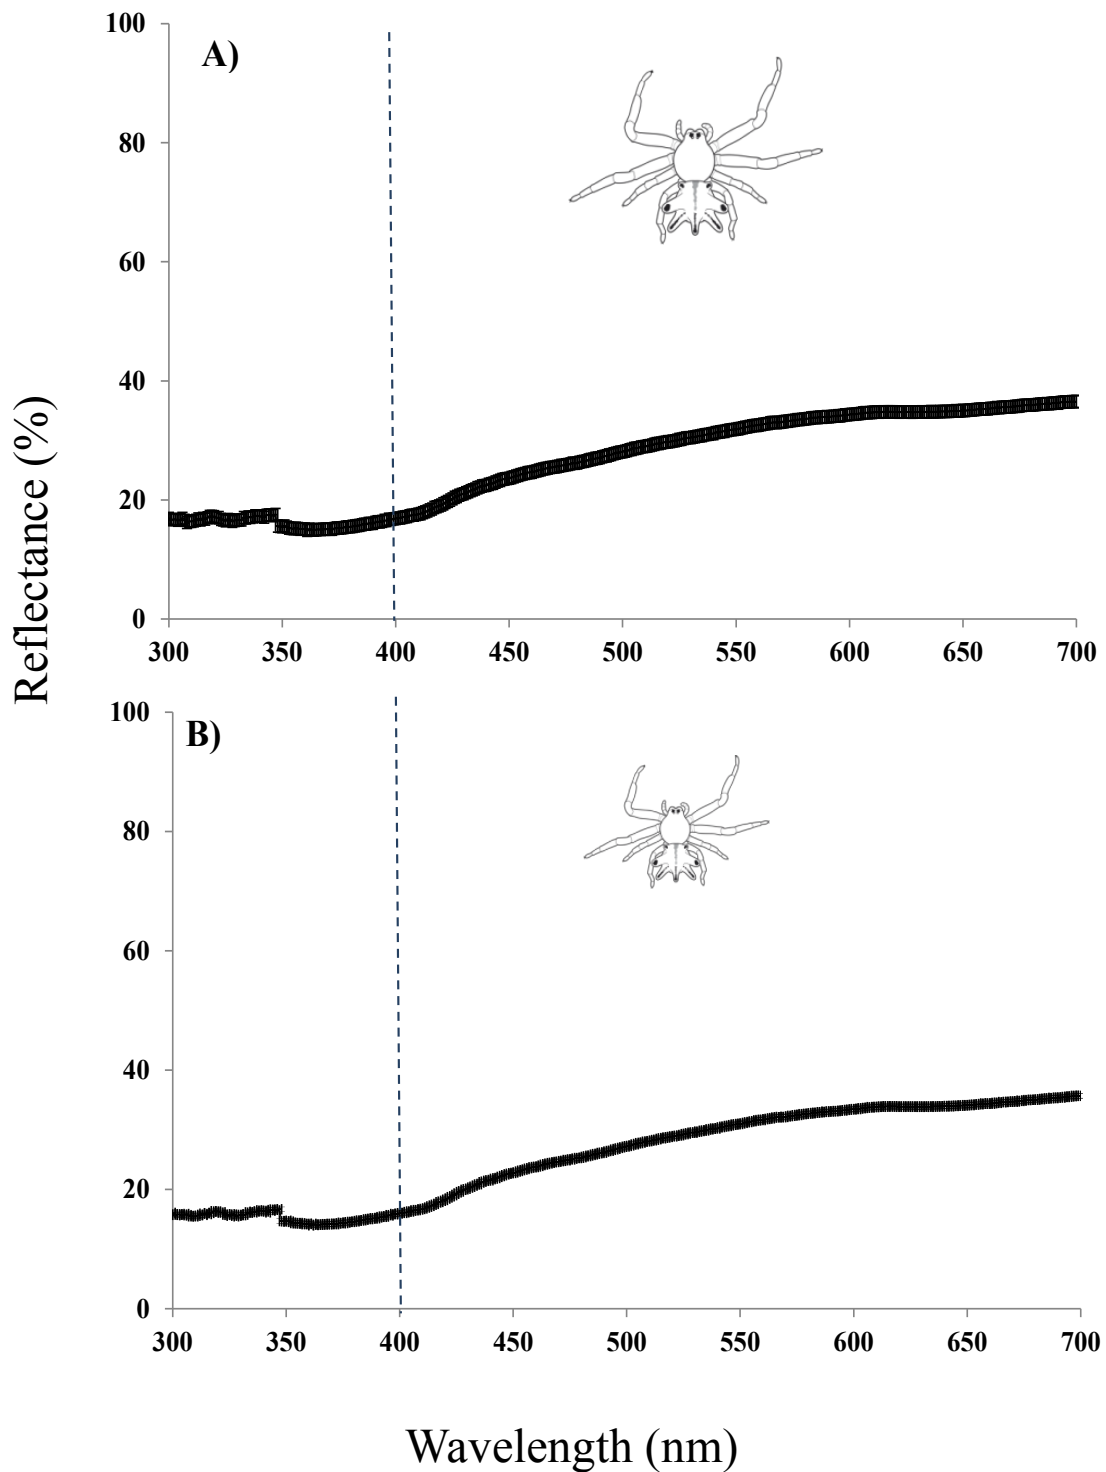

**Supplementary Figure S2.** *Epicadus heterogaster* A) adult upon a leaf, (B) young on a flower. Photo credits: A) Andressa Degressi, B) Tiago Nascimento Bernabé.

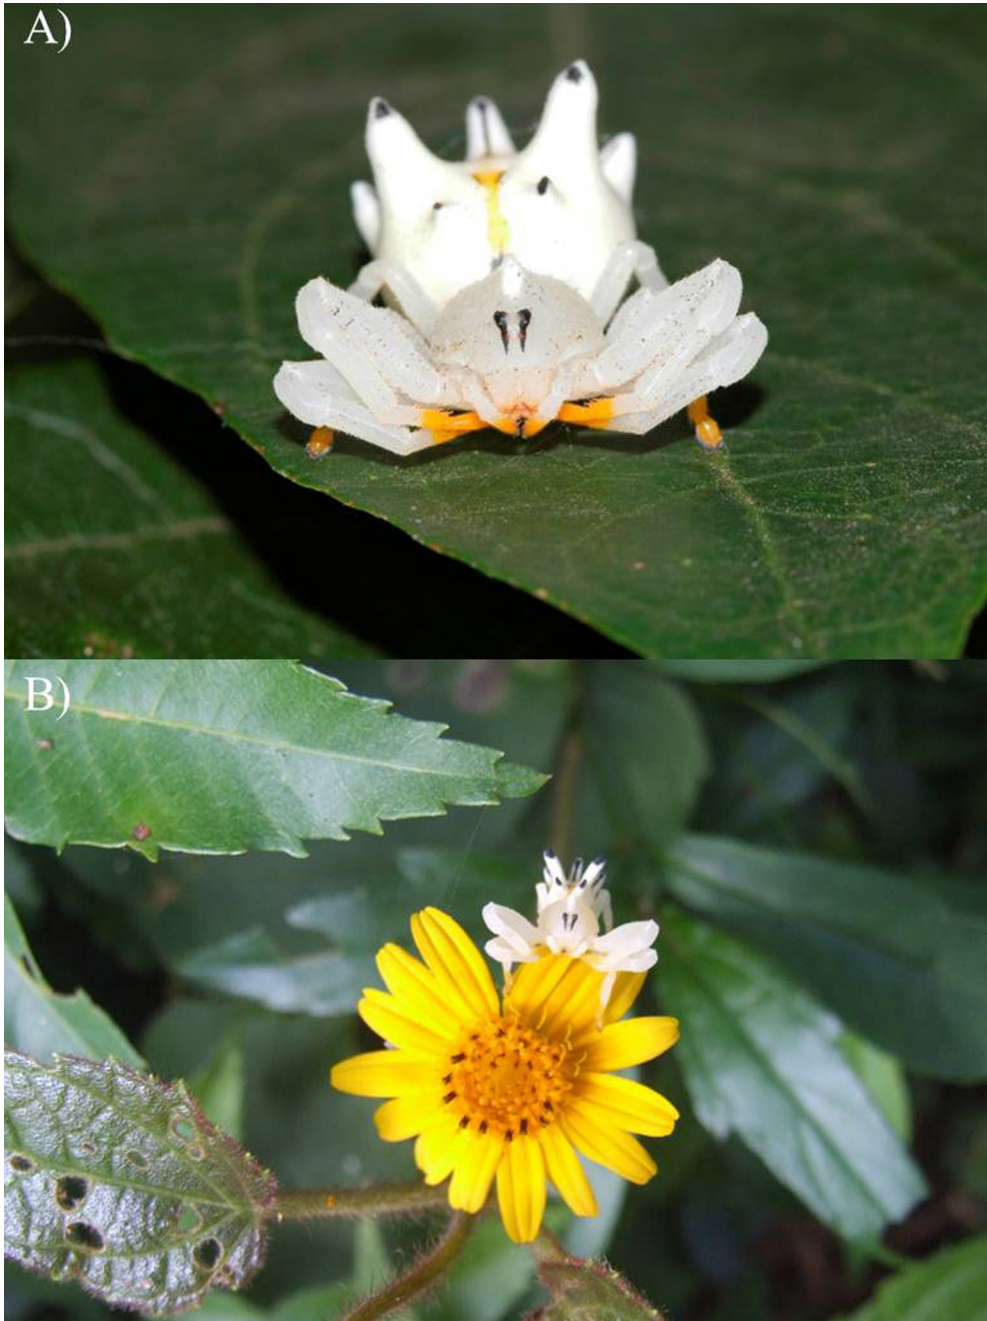

## Supplementary Tables

**Supplementary Table S1. Linear mixed effects models (LME) to assess the significance of the fixed effects (*i.e.*, treatments).** The treatments were: leaves with *Epicadus heterogaster* with sunscreen applied dorsally, leaves with *Epicadus heterogaster* with sunscreen applied ventrally, leaves without crab spiders and leaves with live *Epicadus heterogaster* in the visiting behavior and total avoidance of pollinators, as well as hymenopterans and lepidopterans (Degrees of freedom for the numerator =3, Degrees of freedom for the denominator =34).

| <b>Variation among treatments</b>        | <i>F</i> | <i>P</i> |
|------------------------------------------|----------|----------|
| <b>Total visitation</b>                  | 85.768   | P<0.001  |
| <b>Visitation by Hymenoptera</b>         | 50.835   | P<0.001  |
| <b>Visitation by Lepidoptera+Diptera</b> | 22.460   | P<0.001  |
| <b>Total avoidance</b>                   | 405.641  | P<0.001  |
| <b>Avoidance by Hymenoptera</b>          | 101.219  | P<0.001  |
| <b>Avoidance by Lepdoptera+Diptera</b>   | 197.923  | P<0.001  |

**Supplementary Table S2. List of floral visitors.** The visitors were observed visiting *Epicadus heterogaster* upon leaves during the experiment.

| <b>Order</b> | <b>Family</b> | <b>Morphospecies</b>       |
|--------------|---------------|----------------------------|
| Diptera      | Asilidae      | Asilidae sp.1              |
| Diptera      | Asilidae      | Asilidae sp.2              |
| Diptera      | Syrphidae     | Syrphidae sp.1             |
| Diptera      | Syrphidae     | Syrphidae sp.2             |
| Diptera      | Syrphidae     | Syrphidae sp.3             |
| Diptera      | Xylophagidae  | Xylophagidae sp.1          |
| Hymenoptera  | Apidae        | <i>Apis mellifera</i>      |
| Hymenoptera  | Apidae        | Apidae sp.1                |
| Hymenoptera  | Apidae        | Apidae sp.2                |
| Hymenoptera  | Apidae        | Apidae sp.3                |
| Hymenoptera  | Apidae        | <i>Bombus brasilienses</i> |
| Hymenoptera  | Apidae        | <i>Bombus</i> sp.          |
| Hymenoptera  | Apidae        | <i>Melipona</i> sp.        |
| Hymenoptera  | Apidae        | <i>Trigona</i> sp.1        |

|             |             |                             |
|-------------|-------------|-----------------------------|
| Hymenoptera | Apidae      | <i>Trigona</i> sp.2         |
| Hymenoptera | Vespidae    | <i>Agelaia vicina</i>       |
| Hymenoptera | Vespidae    | <i>Agelaia</i> sp.          |
| Hymenoptera | Vespidae    | <i>Omicron tuberculatum</i> |
| Hymenoptera | Vespidae    | <i>Polybia</i> sp.1         |
| Hymenoptera | Vespidae    | <i>Polybia</i> sp.2         |
| Hymenoptera | Vespidae    | <i>Polistes versicolor</i>  |
| Hymenoptera | Vespidae    | <i>Polybia fastidiosus</i>  |
| Hymenoptera | Vespidae    | <i>Pachymenes</i> sp        |
| Hymenoptera | Halictidae  | Halictidae sp.1             |
| Hymenoptera | Halictidae  | Halictidae sp.2             |
| Lepidoptera | Hesperiidae | Hesperiidae sp.1            |
| Lepidoptera | Hesperiidae | Hesperiidae sp.2            |
| Lepidoptera | Hesperiidae | Hesperiidae sp.3            |
| Lepidoptera | Hesperiidae | Hesperiidae sp.4            |
| Lepidoptera | Hesperiidae | <i>Urbanus chalco</i>       |
| Lepidoptera | Nymphalidae | <i>Aeria olena</i>          |

|             |             |                           |
|-------------|-------------|---------------------------|
| Lepidoptera | Nymphalidae | Nymphalidae sp.1          |
| Lepidoptera | Nymphalidae | <i>Phyciodes claudina</i> |
| Lepidoptera | Pieridae    | <i>Appias drussila</i>    |
| Lepidoptera | Pieridae    | Pieridae sp.1             |

---
